# Supplementary material for: Insights into Proteomics Reveal Mechanisms of Ethanol-Enhanced Bacterial Cellulose Biosynthesis by Komagataeibacter nataicola
Source: MDPI journal article supplement (doi:10.3390/fermentation9060575), 2023-06-17
Supplement: s1 [file s1]

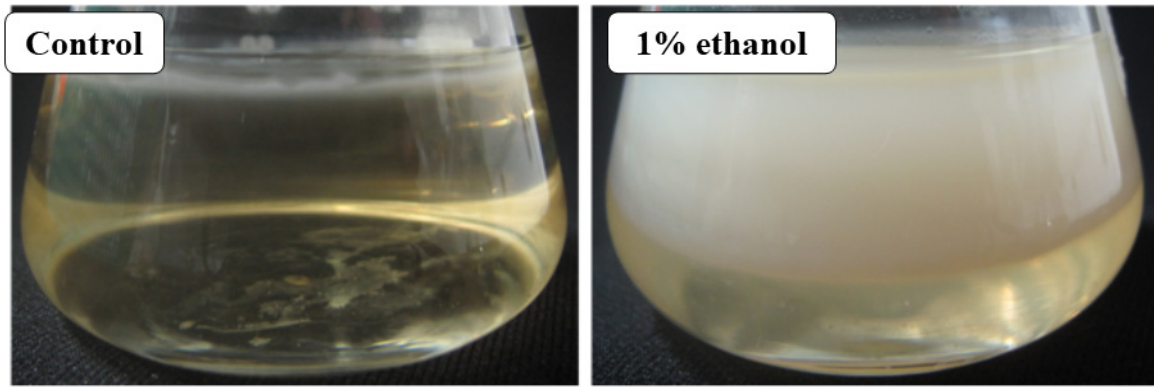

**Figure S1.** Nata de coco pellicle of *K. nataicola* Y19 in media based on coconut water and coconut water with 1% ethanol for 7 d fermentation.

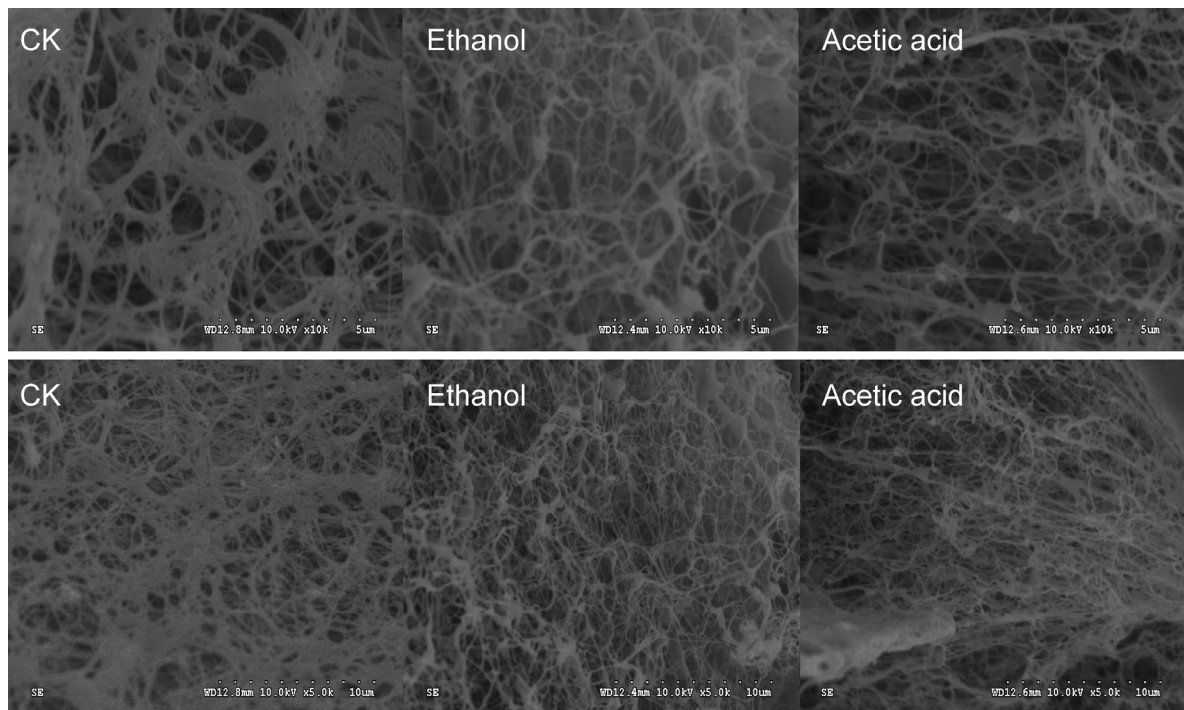

**Figure S2.** Microfibril structure of the BC membrane of *K.nataicola* Y19 in the basal medium (CK) and the basal medium with ethanol and acetic acid.

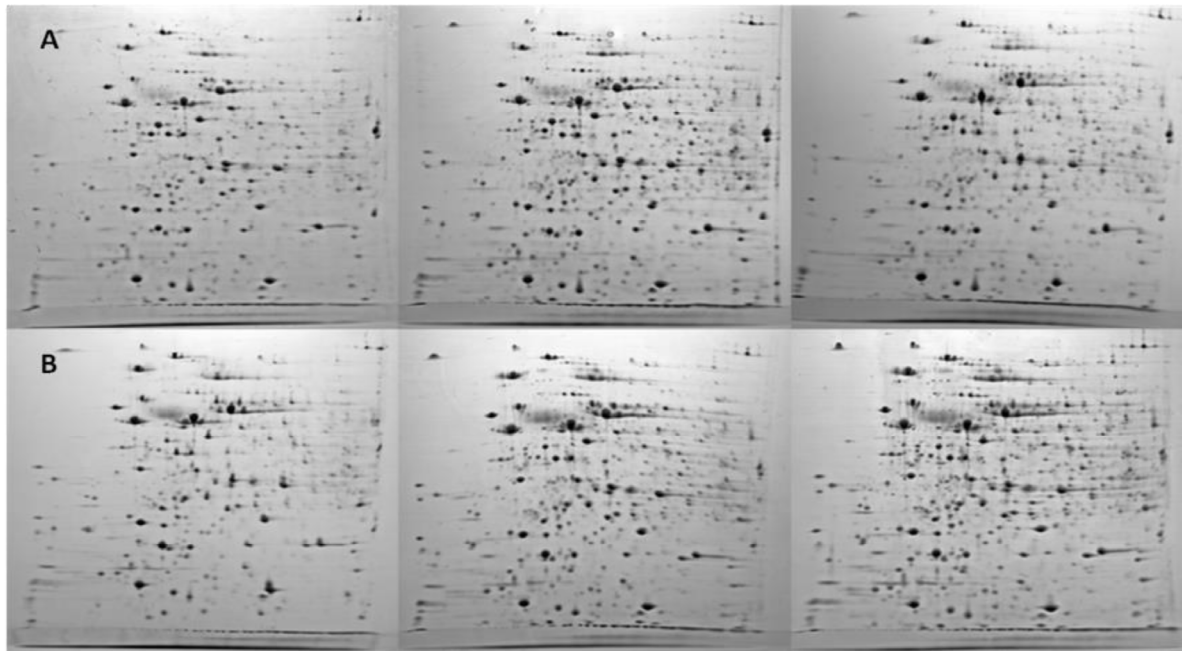

**Figure S3.** (A,B) 2D gel profiles of total proteins of *K. nataicola* Y19 performed in triplicate.
